# Supplementary material
Source: PubMed Central journal article supplement (PMC6119824)

Supplemental Figure 1

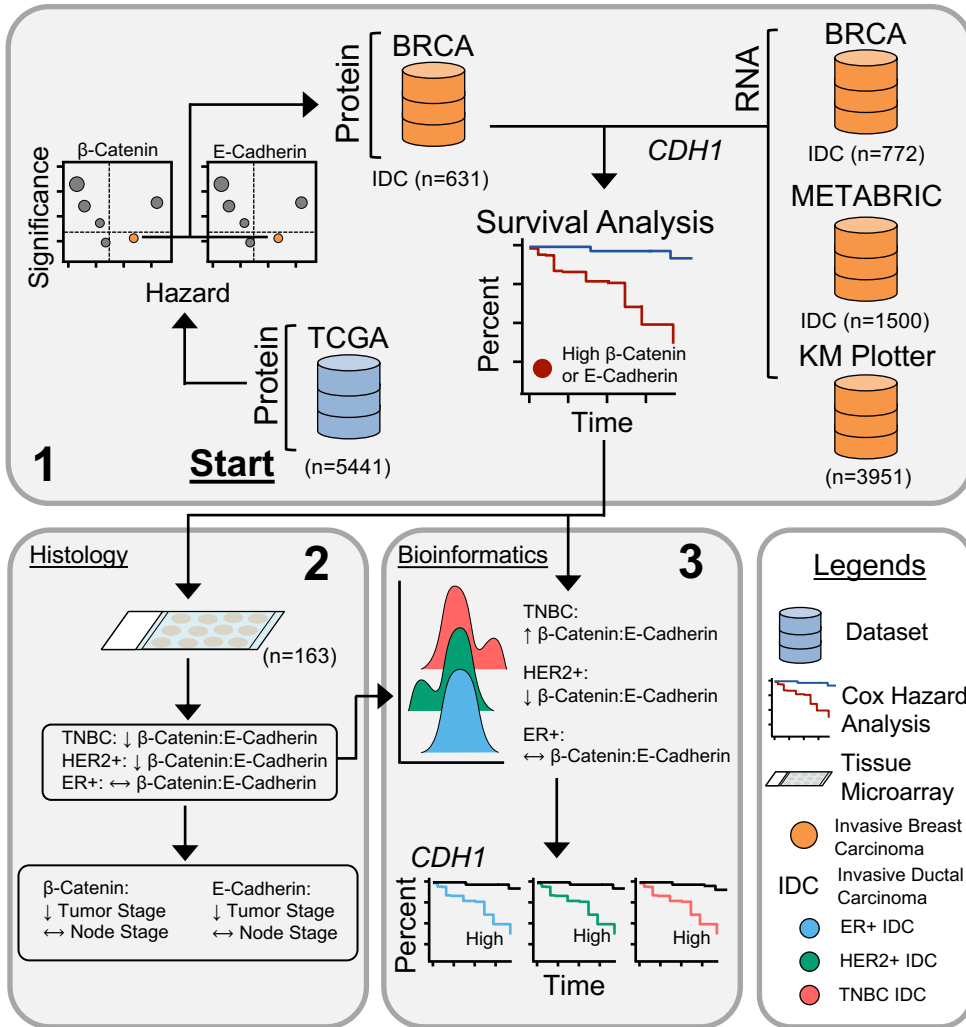

Supplement: mmc1.pdf [file mmc1.pdf]

Supplemental Figure 3

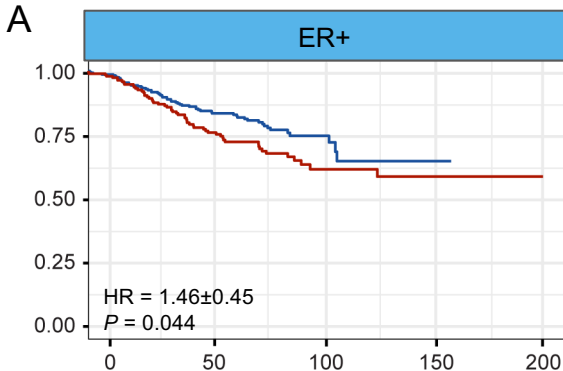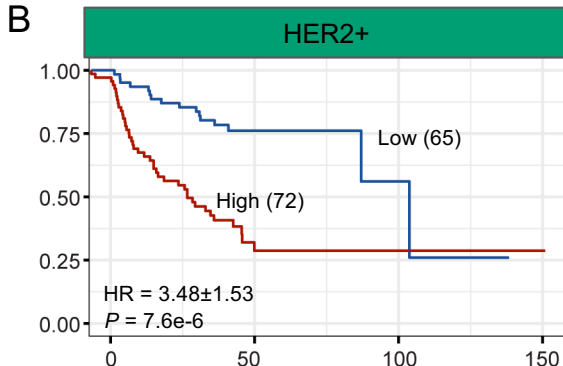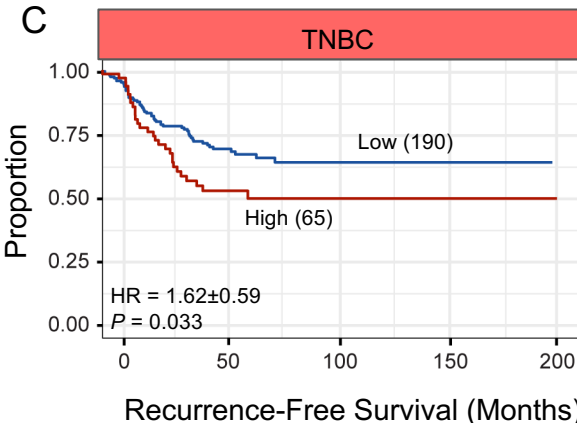

Supplement: mmc3.pdf [file mmc3.pdf]
